# Supplementary material for: Glacial Vermicular Ridge Features on Axel Heiberg Island, Nunavut, Canada
Source: Copernicus journal article supplement (doi:10.5194/egusphere-2024-227), 2024-02-08
Supplement: Supplementary file 1 [file egusphere-2024-227-supplement.pdf]

# Supplementary files

*Glacial Vermicular Ridge Features on Axel Heiberg Island, Nunavut, Canada*

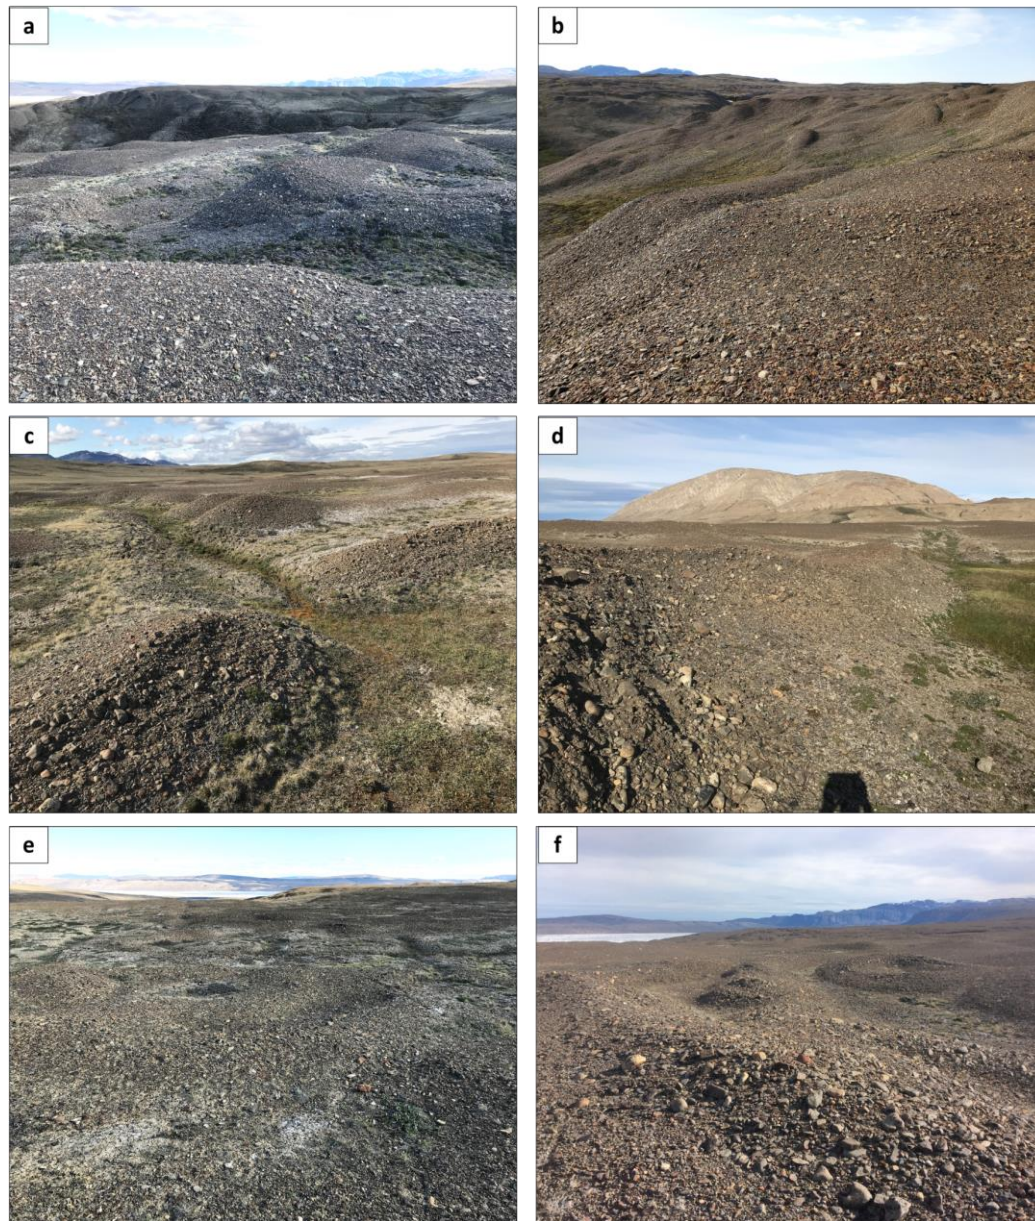

5 **Figure S1: Field photos of terraces in the field region. (a) Rounded mounds at the downvalley part of the main field site looking at another terrace in the foreground. (b) Rounded mounds at terraces across the channel from the main field site. Edge of the VRF-containing deposit shows a thick deposit. (c) Vegetation (grasses and moss) at the main field site. (d) High center polygons in the VRF-containing deposit at the main field site further upvalley where VRFs are less obvious. Weathered surface is darker than the underlying material. (e) Uppermost terrace composed of a thin and degraded VRF-containing deposit. (f) Thick VRF-containing deposit at the terraces across the channel from the main field site.**

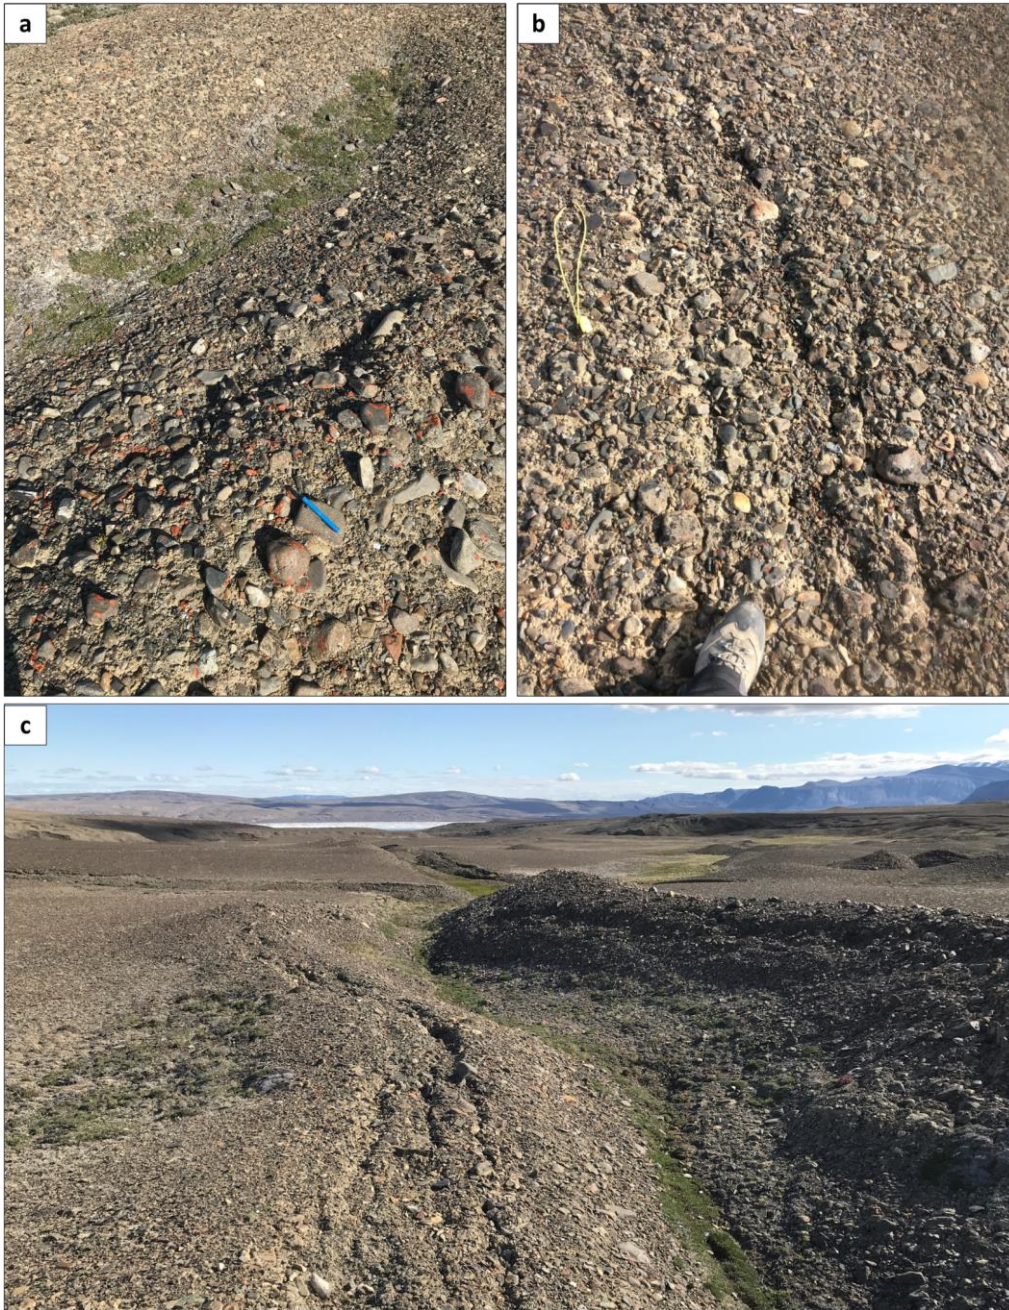

10

**Figure S2: Cracks in the main field site VRF-containing deposit. (a) VRF from Figure 6b shows a crack within the center of the trough and a crack near the axial trace of the ridge. Lichens dominate the ridges and grasses dominate the troughs. Blue pen for scale. (b) Cracks along the axial trace of a VRF ridge. Foot for scale. (c) Cracks along raised polygon shoulders in the VRF-containing deposit.**
